# Supplementary material for: 形鋼の熱間寸法形状計の開発(寸法・形状計測)( 鉄鋼業における最近のセンサ技術)
Source: Frontiers journal article supplement (doi:10.3389/fcvm.2023.1071643), 1993-07-01
Supplement: Data_Sheet_1.PDF [file Data_Sheet_1.PDF]

## Supplementary Material

### 1.1 Supplementary Tables

#### Supplementary Table 1

Symptoms of aortic stenosis at follow up in patients without replaced aortic valve during the course of the study (NOP-group) and patients with aortic valve replacement (OP-group).

|           | Palpitations | Dizziness | Syncope | Dyspnea |
|-----------|--------------|-----------|---------|---------|
| OP-group  | 2            | 1         | 0       | 5       |
| NOP-group | 2            | 4         | 2       | 7       |
| Total     | 4            | 5         | 2       | 12      |

#### Supplementary Table 2

Hemodynamic measurements in the ascending aorta, the aortic arch and the descending aorta at baseline and follow up for a) forward flow volumes, b) WSS and c) peak velocity.

| a)                    | Ascending aorta (ml) | Aortic arch (ml) | Descending aorta (ml) |
|-----------------------|----------------------|------------------|-----------------------|
| First examination     | 65.83 ± 13.68*       | 49.97 ± 10.85*   | 45.83 ± 10.47*        |
| Follow-up examination | 67.11 ± 11.99†       | 50.37 ± 11.19†   | 46.14 ± 10.41†        |

\* =  $p < 0.001$ , † =  $p < 0.001$

| b)                | Ascending aorta (N/m <sup>2</sup> ) | Aortic arch (N/m <sup>2</sup> ) | Descending aorta (N/m <sup>2</sup> ) |
|-------------------|-------------------------------------|---------------------------------|--------------------------------------|
| First examination | 0.61 ± 0.19*                        | 0.49 ± 0.13*                    | 0.46 ± 0.15*                         |

|                       |                         |                         |                         |
|-----------------------|-------------------------|-------------------------|-------------------------|
| Follow-up examination | $0.61 \pm 0.15^\dagger$ | $0.48 \pm 0.12^\dagger$ | $0.47 \pm 0.14^\dagger$ |
|-----------------------|-------------------------|-------------------------|-------------------------|

\* =  $p=0.001$ ,  $^\dagger = p=0.02$

|                       |                         |                         |                         |
|-----------------------|-------------------------|-------------------------|-------------------------|
| c)                    | Ascending aorta (m/s)   | Aortic arch (m/s)       | Descending aorta (m/s)  |
| First examination     | $2.4 \pm 0.83^*$        | $1.41 \pm 0.56^*$       | $1.02 \pm 0.4^*$        |
| Follow-up examination | $2.36 \pm 0.51^\dagger$ | $1.26 \pm 0.33^\dagger$ | $1.03 \pm 0.37^\dagger$ |

\* =  $p=0.015$ ,  $^\dagger = p<0.001$

### Supplementary Table 3

Hemodynamic measurements in non-operated patients the ascending aorta, the aortic arch and the descending aorta at baseline and follow up for a) forward flow volumes, b) WSS and c) peak velocity.

|                       |                        |                           |                           |
|-----------------------|------------------------|---------------------------|---------------------------|
| a)                    | Ascending aorta (ml)   | Aortic arch (ml)          | Descending aorta (ml)     |
| First examination     | $69.32 \pm 14.19^*$    | $53.19 \pm 12.28^*$       | $48.91 \pm 11.52^*$       |
| Follow-up examination | $68.46 \pm 13^\dagger$ | $52.38 \pm 12.84^\dagger$ | $49.64 \pm 11.44^\dagger$ |

\* =  $p<0.001$ ,  $^\dagger = p=0.001$

|                       |                                     |                                 |                                      |
|-----------------------|-------------------------------------|---------------------------------|--------------------------------------|
| b)                    | Ascending aorta (N/m <sup>2</sup> ) | Aortic arch (N/m <sup>2</sup> ) | Descending aorta (N/m <sup>2</sup> ) |
| First examination     | $0.57 \pm 0.18^{*+}$                | $0.5 \pm 0.14^*$                | $0.51 \pm 0.15^+$                    |
| Follow-up examination | $0.6 \pm 0.15^\dagger$              | $0.51 \pm 0.12^\dagger$         | $0.52 \pm 0.14$                      |

\* = p=0.02, <sup>+</sup> = p<0.05, † = p=0.02

| c)                    | Ascending aorta (m/s) | Aortic arch (m/s) | Descending aorta (m/s) |
|-----------------------|-----------------------|-------------------|------------------------|
| First examination     | 1.86±0.23             | 1.26±0.5          | 1.1±0.45               |
| Follow-up examination | 2.3±0.53*             | 1.29±0.4*         | 1.1±0.42*              |

\* = p=0.001

#### Supplementary Table 4

Hemodynamic measurements in operated patients the ascending aorta, the aortic arch and the descending aorta at baseline and follow up for a) forward flow volumes, b) WSS and c) peak velocity.

| a)                    | Ascending aorta (ml) | Aortic arch (ml) | Descending aorta (ml) |
|-----------------------|----------------------|------------------|-----------------------|
| First examination     | 55.38±1.85*          | 44.44±4.48*      | 40.11±4.83*           |
| Follow-up examination | 63.88±9.6†           | 45.79±5.4†       | 39.63±2.42†           |

\* = p<0.05, † = p<0.05

| b)                    | Ascending aorta (N/m <sup>2</sup> ) | Aortic arch (N/m <sup>2</sup> ) | Descending aorta (N/m <sup>2</sup> ) |
|-----------------------|-------------------------------------|---------------------------------|--------------------------------------|
| First examination     | 0.69±0.17*                          | 0.47±0.10*                      | 0.38±0.12*                           |
| Follow-up examination | 0.62±0.16†                          | 0.41±0.09†                      | 0.37±0.08†                           |

\* = p=0.002, † = p=0.002

| c)                    | Ascending aorta (m/s) | Aortic arch (m/s)       | Descending aorta (m/s) |
|-----------------------|-----------------------|-------------------------|------------------------|
| First examination     | 3.22±0.64             | 1.64±0.61* <sup>#</sup> | 0.87±0.26*             |
| Follow-up examination | <sup>+</sup>          | 1.2±0.27† <sup>#</sup>  | 0.88±0.19†             |

<sup>+</sup> cannot be calculated due to artifacts from the implanted valve \* = p=0.018,

† = p =0.001, <sup>#</sup> = p =0.018
